# Supplementary material
Source: PubMed Central journal article supplement (PMC5586373)
Supplement: 215FileS1.pdf [file 215FileS1.pdf]

**Supplementary Figure S1.** Amino acid sequence comparison between orthologous human and zebrafish GREB1L proteins. Note the strong conservation at the c-termini of the proteins, as well as the conservation at positions affected by the mutations. Circled red L residue = position of the Iowa mutation (recapitulated in two of the mouse mutants), circled blue G residue = position of the Danish frameshift mutation, circled purple W mutation = position of the stop codon mutation in the fish.

|            |                                                                                                                             |      |
|------------|-----------------------------------------------------------------------------------------------------------------------------|------|
| Hum GREB1L | MGNSYAGQLKSARFEEALHNSIEASLRCSVVPRPIFSQLYLDPDQHPFSSADVVKPKVED                                                                | 60   |
| Zf Greb1l  | MGNSYAGQLKSARFEEALHNSIEASLR S P+P+F+QLYL+PDQ+ D+KPK+<br>MGNSYAGQLKSARFEEALHNSIEASLRSSGGDPQPVFTQLYLEPDQYSGHVEDIKPKM--        | 58   |
| Hum GREB1L | LDKDLVNRYTQNGSLDFSNLTV---NEMEDDEDDEEMSDSNSPPIPYSPKPAPEGSCT                                                                  | 116  |
| Zf Greb1l  | DL R D S ++ V + +D DDE+ SD++SPP+PY Q P P+G CT<br>---DLSLRS-----DPSTHVLVKCHSSNSVEDMDEDDSDTSSPPLPYLQGPDPGCT                   | 109  |
| Hum GREB1L | TDFCQAGKDLRLVSLCMEQIDIPAGFLLVGAKSPNLPEHILVCAVDKRFPLDDHGKNAL                                                                 | 176  |
| Zf Greb1l  | DGFCQAGKDLRLVS+ E I++PAGF LVGAKSP++PEHILVCAVDKRFPLD++GKNAL<br>VDGFCQAGKDLRLVSMATESIEVPAGFELVGAKSPSIPHEILVCAVDKRFPLDENGGKNAL | 169  |
| Hum GREB1L | LGFSGNCIGCGERGFYRFTFESNHINLKLTTQPKKQKHLKYLVRSQGVLSKGPLICWK                                                                  | 236  |
| Zf Greb1l  | LGFSGNC+GCGE+GFYRFTFESNHINLKL+TQPKKQKHLKYLV++SQG L KG LICWK<br>LGFSGNCVCGEKGFRYRFTFESNHINLKLSTQPKKQKHLKYLVKNSQGALCKGALICWK  | 229  |
| Hum GREB1L | ECRSRQSSASCHSIKPSSSVSSTVTPENGTNGYK-SGFTQTDAA-----NGNSS-----                                                                 | 285  |
| Zf Greb1l  | +C++R S S S K SS SS + ENG TNG+ S F +D+ +G+SS<br>DCKTRPFSNSASSK-PSSSSSLSSKENGDTNGHSPSPFPLSDSPPARMQSGSSSGIFGP                 | 288  |
| Hum GREB1L | -----HGKK-----GSASSSTPAHTGNYSLSRPSY                                                                                         | 311  |
| Zf Greb1l  | HG K G ++ +P T S +P Y<br>QELGFLKPLNTPTHGKTLPIVPTALRVNGLTNGLSMDGRSTLLSPRPTNPLS-TPSHGY                                        | 347  |
| Hum GREB1L | ---ASGDQ--ATMFISGPPKKRHRGWYPGSPLPQGLVVPVPTVRPLS-RTEPLLSAPVP                                                                 | 365  |
| Zf Greb1l  | +GD +T +GPPKKRHR W+P + +P P VPVP +RPL+ + PLLS<br>RTTETGDSASTAMSTGPPKKRHRSHWPTTLVPIPATAVPVPAPRPLTCSSGPLLSSNQ                 | 407  |
| Hum GREB1L | Q-TPLTGILQPRPIPAGETVIVPENLLSNSGVRPVILIGYGTLPYFYGNVGDIVVSPLL                                                                 | 424  |
| Zf Greb1l  | Q ++G++QP+PI AGETVI+P+NLL++ GVRPV+LIG GTLPYF+GNVGD+VVSPLL<br>QPASVSGVIQPPITAGETVIIIPDNLLNSYGVRPVLLIGQGTLPYFFGNVGDIVVSPLL    | 467  |
| Hum GREB1L | NCYKIPQLENKLEKLGTLGSGFLSVENMILLTIQYLVRVLPDQVPLREEFEQIMLKAMQ                                                                 | 484  |
| Zf Greb1l  | +CYK +L K L LG++ +Q L+ E MILLT+OYL RLG +Q+PLREEFEQIMLKAM<br>SCYKGRELNEKTLASLGMSANQLLTTETMILLTLQYLARLGTQIPLREEFEQIMLKAML     | 527  |
| Hum GREB1L | EFTLRERALQIGAQCVPVSPGQLPWLARLIASVSQDLVHVVTQNSLAEGISETLRTLSE                                                                 | 544  |
| Zf Greb1l  | G PVSP QLPWLAR+ ASVS V V+VT SL EGISE+LR+LSE<br>-----CGPTGPPVSPAQLPWLARMEASVSGGSVQVLVTHGSLGEGISESLRSLSE                      | 577  |
| Hum GREB1L | M--RHYQRLPDYVVVICASKIRGNEFCVVVLGQHQSRALESMLTTSEFLKEISYELITG                                                                 | 602  |
| Zf Greb1l  | + Q LP+YV++IC SK NEFCV+VLG++QSRALAESML+T+EFLKEISYELITG<br>TSPQQQCLPNYVLIICTSKSGANEFCVVLVGLKYQSRALAESMLSTNEFLKEISYELITG      | 637  |
| Hum GREB1L | KVSFLASHFKTTSLGDDLKLEKMQRRGDSVVTPFDGDLNECVSPQEAAMIPTQNL                                                                     | 662  |
| Zf Greb1l  | KVS LASHF++TSLGD++DK L + Q++R D VV PF G L E + QEAA MIP D<br>KVSFLASHFQSTSLGDNMDKQLVRYQRKRKDRVVQPFQGHLEIHSQEAAATMIPESGPD     | 697  |
| Hum GREB1L | LDNETFHIYQPQLTVARKLLSQVCAIADSGSQSLDLGHFSKVDFFIIIVRSEVLVQQTLO                                                                | 722  |
| Zf Greb1l  | L ++ F I+ PQL+VAR LLSQVCAIADSGSQSLDLG F KVDF+I+VP S VLV QT+Q<br>LLSDDFQIHPQLSVARLLSQVCAIADSGSQSLDLGRFCKVDFLILVPPSHVLVHQTVO  | 757  |
| Hum GREB1L | RIRQSGVLVDLGLENGTAHQRAEKYVVRDNEIQTKFEVFMRRVKQNPYTLFVLVHDNS                                                                  | 782  |
| Zf Greb1l  | RIRQSGVL+DLG+E+ A Q+++KYVVRD E+ TK E FMR+VKQNPYTLFVL+HDNS<br>RIRQSGVLIDLGIEDVSLAMQKSDKYVVRDTEVHTKMEAFMRKVKQNPYTLFVLIHDNS    | 817  |
| Hum GREB1L | HVELTAVISGSLSHSEPSHGLADRVINCREVLEAFNLLVLQVSSFPYTLQTQSRISSSN                                                                 | 842  |
| Zf Greb1l  | HV+LTS +SGS+ H E GLADRV+NC EVLEA NLLVLQVS FP+TLQ++QSRIS+ N<br>HVDLTSALSGSVCHGE-LQGLADRVVNCPEVLEAINLLVLQVSCFPFTLQSRISTQN     | 876  |
| Hum GREB1L | EVHWIQLDTGE-DVGCEEKLYFGLSEYSKSLQWGITSPLLRCDETFEEKMVNTLLERYPRL                                                               | 901  |
| Zf Greb1l  | EVHW + + + ++ +YFGL +YSKSLQW+ SP+LRCD+ FE+MV TLLER+P L<br>EVHWPDTENQQGEASPKDLIYFGLKDYSKSLQWGVASPIILRCDDAFERMVKTLLEHHPHL     | 936  |
| Hum GREB1L | HSMVVRCYLLIQYSEALMALTTMASLRDHSTPETLSIMDDLISPPGKNKSGRGHMLIIR                                                                 | 961  |
| Zf Greb1l  | HSMV+R YLLIQY+EALMALT SLRDH TP+TL++++DL+S PG++K G GHML++R<br>HSMVIRSULLIQYTEALMALTAAPSLRDHVTPQTLAMVEDLLSVPGRSKHGCGHMLLVR    | 996  |
| Hum GREB1L | VPSVQLAMLAKEERLQEVDRKLGQYRFEIILGNPATELSVATHFVARLKSWRGNEPEEWI                                                                | 1021 |
| Zf Greb1l  | VPS+QLA LA+ERL+E RDKLGLQYRF ++LG+PA E+S+ HF ARL++WRG + EEW+                                                                 |      |

|            |                                                                                                                                |      |
|------------|--------------------------------------------------------------------------------------------------------------------------------|------|
| Zf Greb11  | VPSLQLARLAQERLEEARDKLGQYRFAVLLGSPAAEISLPVHFCARLRRAWRGCKNEEW                                                                    | 1056 |
| Hum GREB1L | PRTYQDLGLPCIVILTGKDPGETFPFRSLKYCDLRLIDSSYLTRTALEQEVGLACCYVS                                                                    | 1081 |
| Zf Greb11  | P TY+DL+GLPCIVILTGKDPGETFPFRSLKYCDLRLIDSSYLTRTALEQEVGLAC YV+<br>PHTYEDLEGLPCIVILTGKDPGETFPFRSLKYCDLRLIDSSYLTRTALEQEVGLACSYVT   | 1116 |
| Hum GREB1L | KEVIRGPTVALDLSGKEQERAAVSEN--DSELLIDLERPQSNSSAVTGTSGSIMENGVS                                                                    | 1139 |
| Zf Greb11  | + VI A + +E S + D+L ++LERP SN+SA T TSGS ENGVS<br>RRVIPKTKTATSREERPREGERSSGETAEHDDLPMELERPPSNASAATRSTSGSTENGVS                  | 1176 |
| Hum GREB1L | SSSTADKSQKQSLTPSFQSPATSLGLDEGVSASSAGAGAGETLKQECD-----                                                                          | 1187 |
| Zf Greb11  | SSS DK QS P S + + S+ KQECD<br>SSSILDKPSQS-----DPCGSRMTMDSCESSPV-----RFKQECDSQAPSSSSTSSF                                        | 1223 |
| Hum GREB1L | ----SLGPQMASSTTSKPSSSSSGPRTLWPWGQPIRGCRGPAALPPVVILSKAAYSLLG                                                                    | 1243 |
| Zf Greb11  | S +S +PS S+ PR C Q P +LS+AA+LL<br>SSASSSSSSSSPAAQRPSQSTQAPRE-----CNRTQ-VFPRTAVLSRAAYTLA                                        | 1272 |
| Hum GREB1L | SQKSGKLPSSSSLLPHADVAVVSSLRPLLNDMSSEEQSLYRQWTLARQHHADYSNQLD                                                                     | 1303 |
| Zf Greb11  | + G PSS+SLLPHADV+W S LRP + + EQSLYRQWT ARQHHADY +<br>PETLGH-PSSASLLPHADVSSWSPFRPPVPHGLGGAEQSLYRQWTTARQHHADYEGPVP               | 1331 |
| Hum GREB1L | PASGTRNFHPRRLLLTGPPQVGKGTGSYLQFLRILFRMLIRLLEVDVYDEEEINTDHNESS                                                                  | 1363 |
| Zf Greb11  | + HPRRLLL+GPPQVGKGT+YLQFLRILFRMLIRLLEVDVYDEEE+ D + S<br>-----HPRRLLLSGPPQVGKGTGAYLQFLRILFRMLIRLLEVDVYDEEELEEDVQDKS             | 1385 |
| Hum GREB1L | EVSQSEGEPPWDIESFSKMPFDVSVHDPKYSLSMLVYTEKL---AGVKQEVIKESKVEE                                                                    | 1419 |
| Zf Greb11  | +V S G WPD+E K+ FD+ HD K+ S VY ++ +GVK E + +<br>KVPPSSGPQWPDVEDVRKLRFDLCPHDCKFKYSSPVYANRMPKTSQSGVKTERLDTEA--D                  | 1443 |
| Hum GREB1L | PRKRETVSIMLTKYAAAYNTFHHCEQCRQYMDFTSASQMSDSTLHAFTFSSMLGEEVQLY                                                                   | 1479 |
| Zf Greb11  | P KR TVS+ L+ +AA+N FHHCEQC Y + A+Q+SD T HAFTF SSMLGEEVQL+<br>PPKRN TVSVRLSFAAHNAFHHCCEQCHHYSEPIPAQLSDCTFHAFTFCSSMLGEEVQLH      | 1503 |
| Hum GREB1L | FIIPKSKESHFVFSKQGHLESMLRPLVSDKNLNAVKSPIFTPSSGRHEHGLLNLFHAME                                                                    | 1539 |
| Zf Greb11  | FIIPKSKESHFVFS+QG HLESMLRPL+SDK +KSPIFTP++GR EHGLLN++HAME<br>FIIPKSKESHFVFSQOGSHLESMLRPLLSDKESGMMKSPIFTP TTGRQEHGLLNIYHAME     | 1563 |
| Hum GREB1L | GISHLHLLLVVKEYEMPLYRKYWPNHIMLVLPGMFNAGVGAARFLIKELSYHNLELERNR                                                                   | 1599 |
| Zf Greb11  | G HLH+LVVK+YEMPLYRKYWPNHI+LVLP MFNN+GVGAARF+IKELSYHNLELERNR<br>GAEHLHILLVVKQYEMPLYRKYWPNHILLVLPAMFNNSGVGAARFMIKELSYHNLELERNR   | 1623 |
| Hum GREB1L | LEELGIKRQCVWPFIVMMDDSCVLWNIHSVQEPSSQPMVEGVSS-KNVSLKTVLQHI EAT                                                                  | 1658 |
| Zf Greb11  | EE G+KRQ VWPFI VMMDDSCVLWN + QP G + NVSLK+VLQH+EAT<br>QEEQGVKRQDVWPFIVMMDDSCVLWN-----AQQPGPDGKTEVMNVSLKSVLQHM EAT              | 1676 |
| Hum GREB1L | PKIVHYAILGIQKWSSKLTSQLKAPFSRCHVHDFILLNTDLTQNVQYDFNRYFCEDADF                                                                    | 1718 |
| Zf Greb11  | PKI YA+ G++KWSS L+SQ+ +PFSRCH+HD ILLN DLTQNVQYD NR+ CE+ DF<br>PKISQYAVCGLRKWSSSLSQAPTSPFSRCHLHDLILLNVDLTQNVQYDLNRF TCEEVDF     | 1736 |
| Hum GREB1L | NLRTNSSGLLICRFNFSMLKHKHVQVGQRDFI IKPKIMVSESLAPILPLQYICAPDSEH                                                                   | 1778 |
| Zf Greb11  | NLR NSSGLL+CRFN FS+MKKH+ +GG +DF+IKPK+M E+ + QY+CAPDSE<br>NLRANSSGLLLCRFNQFSIMKHKHIPIGHKDFLIKPKLMRIETPVRCASQYVCAPDSEQ          | 1796 |
| Hum GREB1L | TLAAPAQFLEKFLQHASYKLFPAIHNFRSPVLAIDCYLNGPEVAICYISSRPHSSN                                                                       | 1838 |
| Zf Greb11  | TLAAPAQFLEKFLQ S++LFP A+ N +PVL+ID YLN+GPEV +CY+SSRPHS N<br>TLAAPAQFLEKFLQSCSHRLFPALSNSANPVL SIDSYLNLGPEVQVCYVSSRPHSVN         | 1856 |
| Hum GREB1L | VNCEGVFFSGLLLYLCD SFVGD-LKKFKFLK GATLCVICQDRSSLRQTIVRLELEDEWQ                                                                  | 1897 |
| Zf Greb11  | V+ +GV FSGLLLYLCD SFV + LKKF FLK GATLCVICQDRSSLRQTIVRLELEDEWQ<br>VDHQGVIFSGLLLYLCD SFVVSLLKKFNFLK GATLCVICQDRSSLRQTIVRLELEDEWQ | 1916 |
| Hum GREB1L | FRLRDEFQTANSSDDKPLYFLTGRHV 1923                                                                                                |      |
| Zf Greb11  | FRLRDEFQTAN S+D+PLYFLTGRH+<br>FRLRDEFQTANCSSEDRPLYFLTGRHI 1942                                                                 |      |

**Supplemental Figure S2.** Renal morphology of zebrafish in which *greb1l* expression is inhibited with morpholino or mutated with CRISPR/Cas9. All images are lateral views of zebrafish larvae at 4 days post fertilization, rostral to the left, fixed and processed to reveal anti-Na,K ATPase antibody (a6F) immunoreactivity. Wild type embryos were injected with (A) the "standard control" MO that is complementary to no sequence in the zebrafish genome (Gene Tools), (B) an MO targeting e3/i3 of *greb1l*, (C) Cas9 protein alone, or (D) Cas9 protein plus guide RNA targeting *greb1l* exon 17 (of 34). (A,C) In control embryos, the junction of the proximal convoluted tubule and the neck exhibited the hairpin structure characteristic of wild-type embryos. (B,D) In strongly-affected (B) *greb1l* MO-injected or (D) *greb1l* gRNA injected embryos, the structure of this region was kinked. (E) Table depicting the number of fish observed and the percentage of them that displayed kidney deformities.

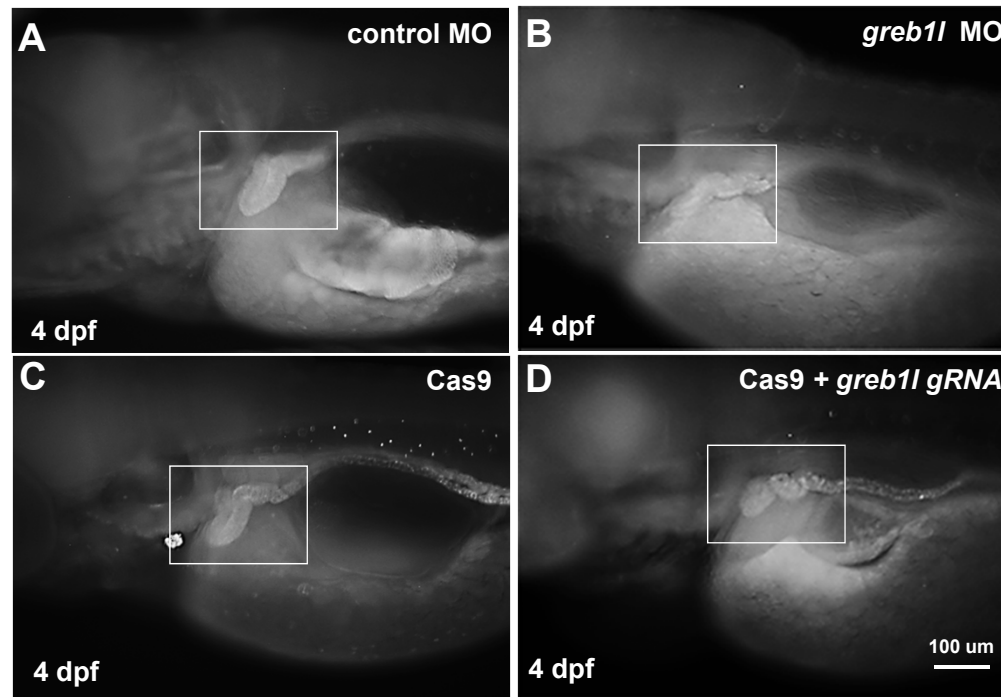

| <b>E</b>                  | <b>% abnormal morphology of PCT/Neck junction</b> | <b>Number of embryos (# of experiments)</b> |
|---------------------------|---------------------------------------------------|---------------------------------------------|
| Control MO                | 4                                                 | 45 (3)                                      |
| <i>greb1l</i> e3i3 MO     | 85                                                | 135 (3)                                     |
| Cas9                      | 6                                                 | 33 (3)                                      |
| Cas9 + <i>greb1l</i> gRNA | 42                                                | 144 (3)                                     |

**Supplementary Figure S3.** Mutagenized alleles recovered from affected CRISPR F0 mouse embryos. (A) Reference genomic sequence is shown at top with recovered mutant alleles shown below for each embryo displaying kidney phenotype. Notably, embryos #1 and 2 shared the same in-frame deletion in addition to the desired KI allele. The number in parentheses indicates the number of clones identified with the specific mutation. (B) Chromatograms of cloned reads corresponding to mutations described in (A).

# A

E K F L Q H A S Y K L F P  
 WT- GAG AAG TTC CTT CAA CAT GCC TCA TAT AAA CTC TTC CCT

## Greb1I-F0-1

E K F **R** Q H A S Y K L F P  
 #1 GAG AAG **TTT** **CGT** CAA CAT GCC TCA TAT AAA CTC TTC CCT (4/8)  
 E K F L H A S Y K L F P  
 #2 GAG AAG TTC CTT CA- --T GCC TCA TAT AAA CTC TTC CCT (4/8)

## Greb1I-F0-2

E K F **R** Q H A S Y K L F P  
 #1 GAG AAG **TTT** **CGT** CAA CAT GCC TCA TAT AAA CTC TTC CCT (3/8)  
 E K F L H A S Y K L F P  
 #2 GAG AAG TTC CTT CA- --T GCC TCA TAT AAA CTC TTC CCT (5/8)

## Greb1I-F0-14

E K F L Q H M P H I N S S R \*  
 #1 GAG AAG TTC CTT CAA C**ac** **a**TG CCT CAT ATA AAC TCT TCC...AGG TAG (3/3)

# B

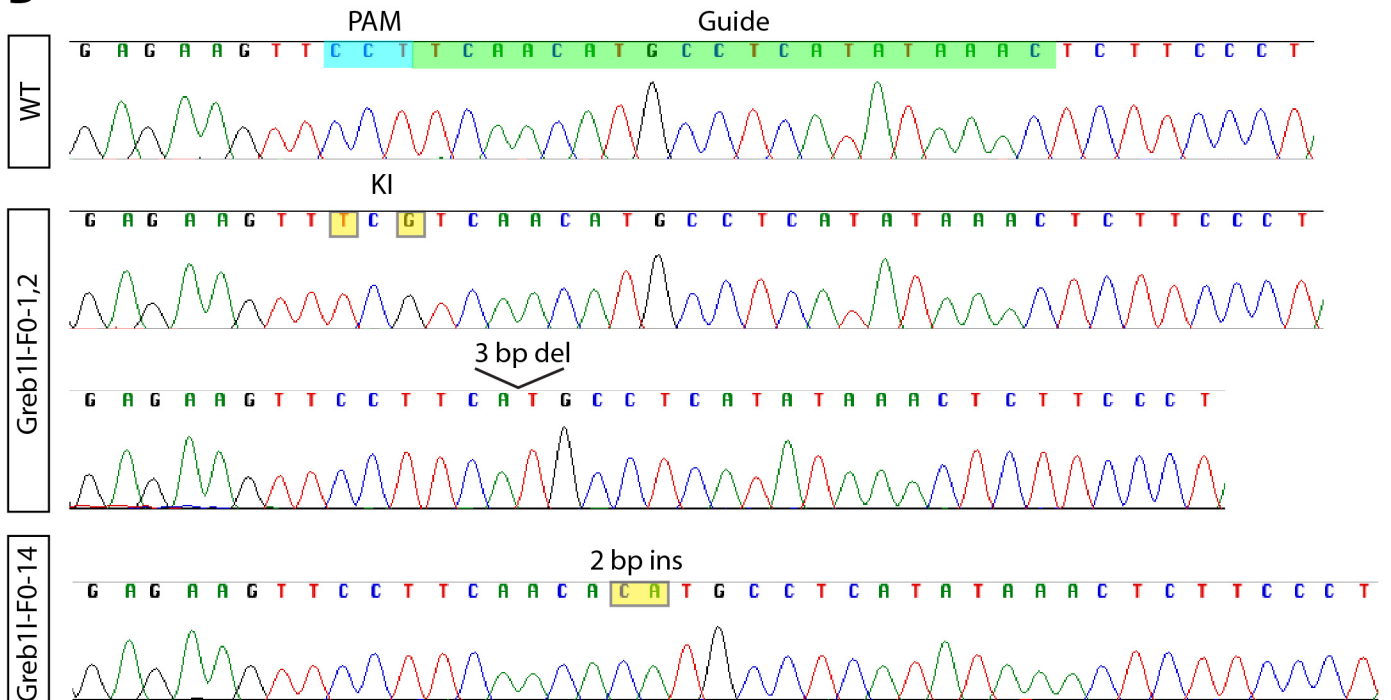

**Supplementary Table S1.** Whole exome mapping statistics for four cases (Iowa family).

Across the samples, we achieved an average targeted exome coverage of 171.69X with a mean mapping quality 45.30 for calling high quality variants.

| <b>Individual</b> | <b>Total # reads</b> | <b># mapped reads / % of total reads</b> | <b># mapped reads in target region / % of total reads</b> | <b>Mean coverage in target region</b> | <b>Mean mapping quality in target region</b> |
|-------------------|----------------------|------------------------------------------|-----------------------------------------------------------|---------------------------------------|----------------------------------------------|
| II.4              | 138,952,013          | 121,216,737 / 87.24%                     | 100,480,821 / 72.31%                                      | 131.08                                | 44.53                                        |
| II.6              | 151,277,545          | 149,022,896 / 98.51%                     | 123,983,267 / 81.96%                                      | 160.78                                | 45.87                                        |
| III.4             | 179,371,347          | 163,104,270 / 90.93%                     | 138,330,046 / 77.12%                                      | 177.45                                | 45.07                                        |
| III.7             | 201,991,695          | 198,300,809 / 98.17%                     | 166,643,662 / 82.50%                                      | 217.45                                | 45.71                                        |
| <b>Average</b>    | <b>167,898,150</b>   | <b>157,911,178 / 93.71%</b>              | <b>132,359,449 / 78.47%</b>                               | <b>171.69</b>                         | <b>45.30</b>                                 |

**Supplementary Table S2.** Whole exome mapping statistics for two cases and three unaffected family members (Denmark family). Across the samples, we achieved an average targeted exome coverage of 127X with a mean mapping quality of 62 for calling variants of high quality.

| <b>Individual</b>    | <b>Total # reads</b> | <b># mapped reads / % of total reads</b> | <b># mapped reads in target region / % of total reads</b> | <b>Mean coverage in target region</b> | <b>Mean mapping quality in target region</b> |
|----------------------|----------------------|------------------------------------------|-----------------------------------------------------------|---------------------------------------|----------------------------------------------|
| Fetus                | 161,010,696          | 159,630,813 /99.14%                      | 137,922,285 /85.66%                                       | 223.7                                 | 62.33                                        |
| Mother               | 70,125,707           | 69,581,369 /99.22%                       | 59,504,884 /84.85%                                        | 100.4                                 | 61.3                                         |
| Father               | 69,880,361           | 69,349,566 /99.24%                       | 59,425,709 /85.03%                                        | 98.4                                  | 61.56                                        |
| Maternal Grandmother | 64,728,968           | 64,216,353 /99.2%                        | 54,985,396 /84.94%                                        | 92.2                                  | 61.44                                        |
| Maternal Grandfather | 85,311,447           | 84,643,305 /99.21%                       | 72,529,359 /85%                                           | 120.5                                 | 61.44                                        |
| <b>Average</b>       | <b>89,484,281</b>    | <b>99%</b>                               | <b>76,873,527 /85%</b>                                    | <b>127</b>                            | <b>62</b>                                    |
